# Supplementary material
Source: Springer Nature journal article supplement (https://www.springermedizin.de/resource/supplementary/12936_2010_1755_MOESM2_ESM.pdf/9541610)

1

2

3

4

5

6

7

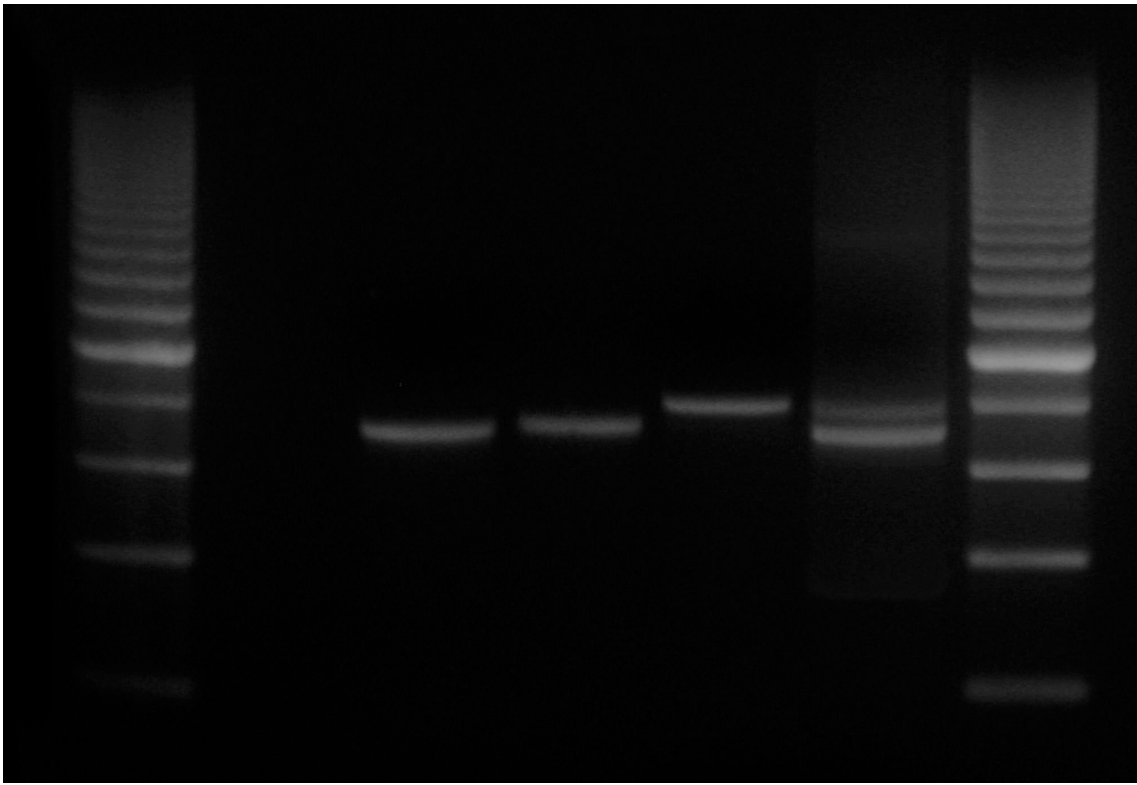

Supplement: MOESM2 [file 9541610]
